# Supplementary material for: The Stress-Inducible BCL2A1 Is Required for Ovarian Cancer Metastatic Progression in the Peritoneal Microenvironment
Source: MDPI journal article supplement (doi:10.3390/cancers13184577), 2021-09-12
Supplement: s1 [file s1]

Supplementary Fig. S1

| Dominant signaling pathways                                                               | Gene hits                 |
|-------------------------------------------------------------------------------------------|---------------------------|
| Wnt signaling pathway(P00057)                                                             | CDH10, CDH13, HDAC3, GNG4 |
| Inflammation mediated by chemokine and cytokine signaling pathway(P00031)                 | ALOX5AP, CCL5, IL-8, GNG4 |
| Apoptosis signaling pathway(P00006)                                                       | BCL2A1, MAP4K1            |
| Heterotrimeric G-protein signaling pathway-Gi alpha and Gs alpha mediated pathway(P00026) | GRM1, GRK1, GNG4          |

Gene ontology analysis of the whole human genome expression array results using genes with upregulation or downregulation >2 folds from a panel of gynaecological cancer cell lines treated by Hypoxia (0.5% O2, 24 h) and normoxia.
