# Supplementary material for: The Stress-Inducible BCL2A1 Is Required for Ovarian Cancer Metastatic Progression in the Peritoneal Microenvironment
Source: MDPI journal article supplement (doi:10.3390/cancers13184577), 2021-09-12
Supplement: s1 [file s1]

Supplementary Fig. S4

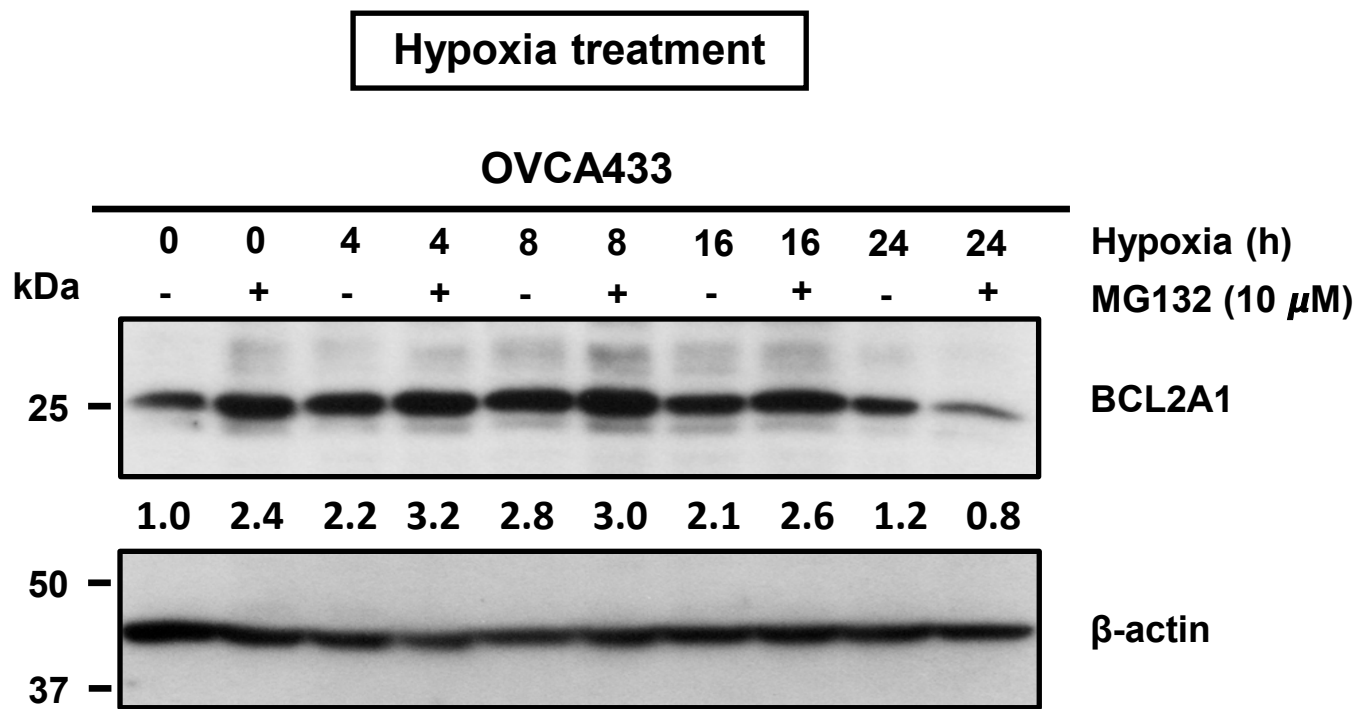

Western blot analysis showed the different protein level of BCL2A1 in OVCA433 treated with or without MG132 (10 $\mu$ g) upon hypoxia (0.5% O<sub>2</sub>) treatment with various time points .
