# Supplementary material for: The Stress-Inducible BCL2A1 Is Required for Ovarian Cancer Metastatic Progression in the Peritoneal Microenvironment
Source: MDPI journal article supplement (doi:10.3390/cancers13184577), 2021-09-12
Supplement: s1 [file s1]

Supplementary Fig. S3

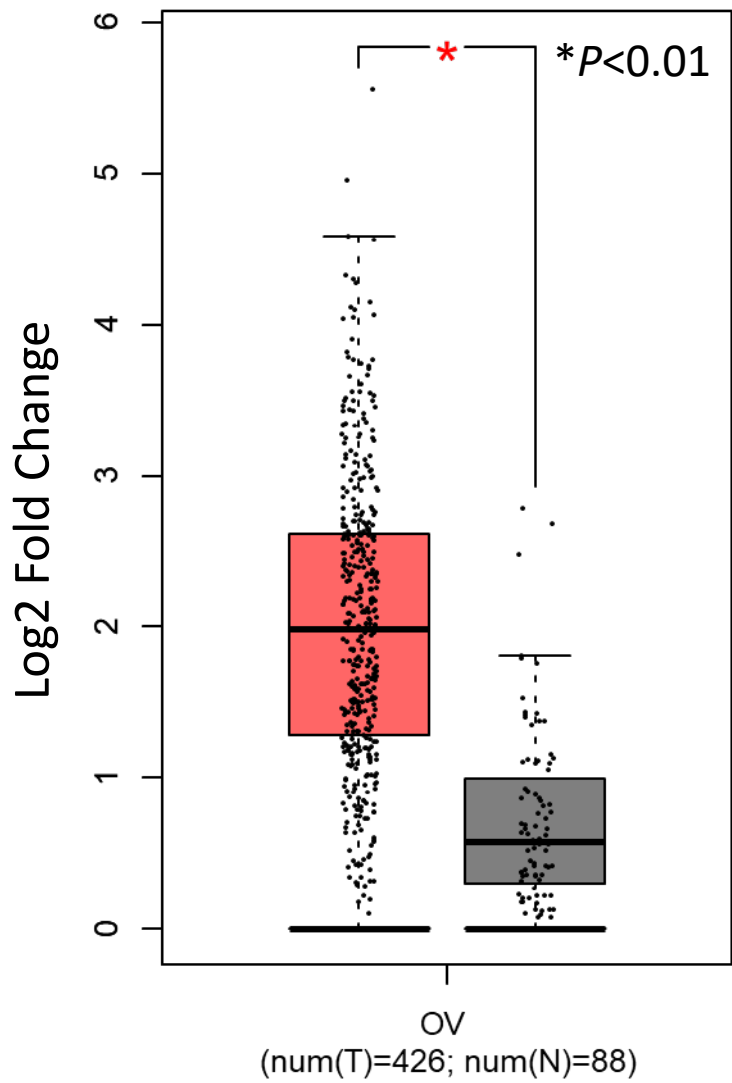

The expression of BCL2A1 in ovarian cancers (N=426) when compared with the normal ovaries (N=88). The data was obtained from TCGA and GTEx, and analyzed by GEPIA ([www. http://gepia.cancer-pku.cn](http://gepia.cancer-pku.cn)). OV=Ovarian cancer.  $*P < 0.01$ .
