# Supplementary material for: The Stress-Inducible BCL2A1 Is Required for Ovarian Cancer Metastatic Progression in the Peritoneal Microenvironment
Source: MDPI journal article supplement (doi:10.3390/cancers13184577), 2021-09-12
Supplement: s1 [file s1]

Supplementary Fig. S5

OVCA433

BCL2A1 overexpression

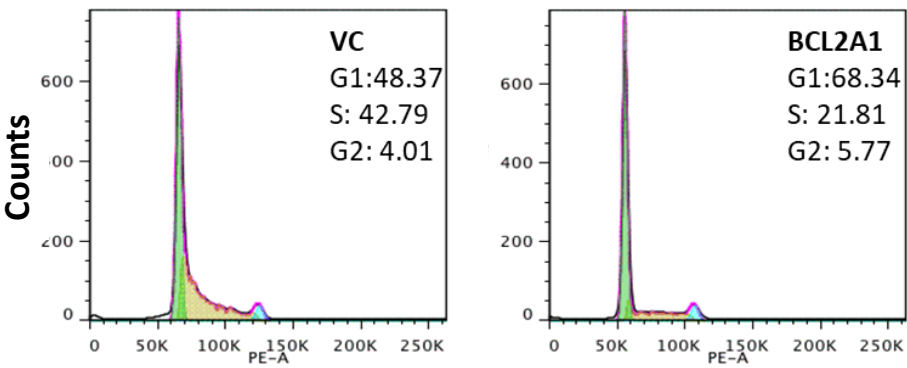

OVCA433

BCL2A1 knockdown

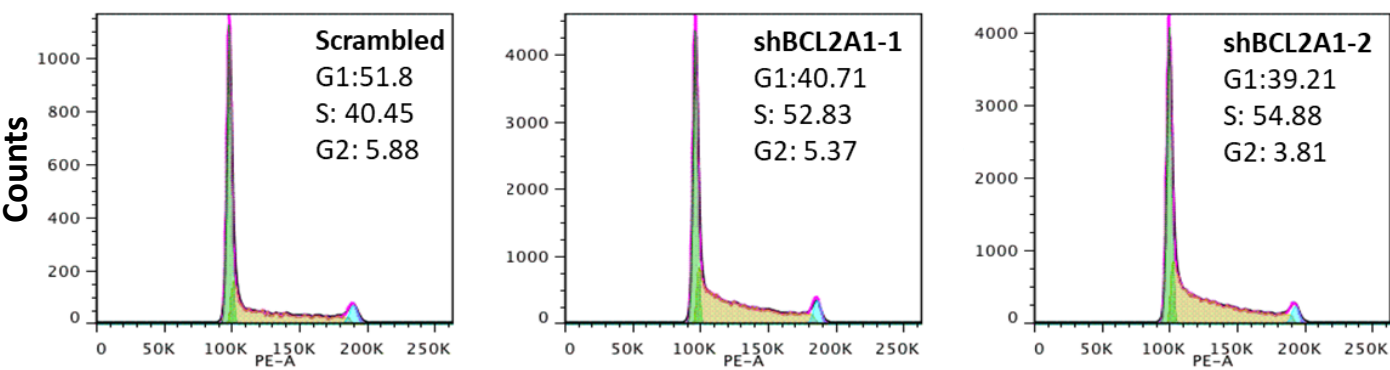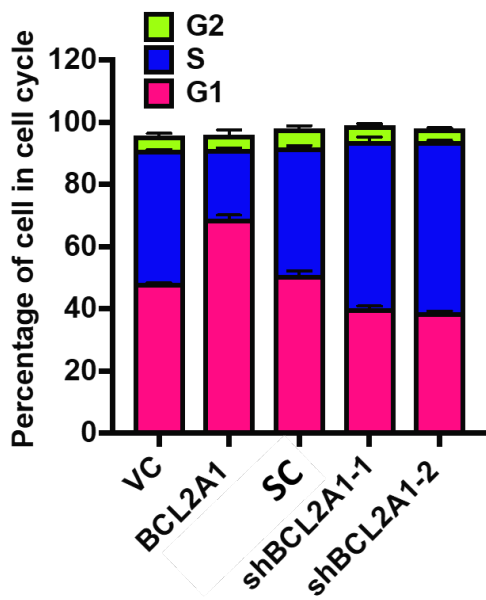

(Upper) Flow cytometry cell cycle analysis demonstrated that BCL2A1 overexpressing cells BCL2A1) exhibit higher level of G1-phase arrest compared to vector control cells (VC) in OVCA433. In contrast, knockdown of BCL2A1 (shBCL2A1-1 and shBCL2A1-2) exhibits less G1-phase cell arrest compared to the scrambled Control. (Lower) Comparison of cell cycle distribution of cells with BCL2A1 overexpression or knockdown.
