# Supplementary material for: The Stress-Inducible BCL2A1 Is Required for Ovarian Cancer Metastatic Progression in the Peritoneal Microenvironment
Source: MDPI journal article supplement (doi:10.3390/cancers13184577), 2021-09-12
Supplement: s1 [file s1]

Supplementary Fig. S2

| Model ID | Model Name | Score | Relative Score | Start | End  | Strand | Predicted Site Sequence |
|----------|------------|-------|----------------|-------|------|--------|-------------------------|
| MA0107.1 | RELA       | 7.97  | 0.808987952    | 256   | 265  | -1     | GTGAATTCA               |
| MA0107.1 | RELA       | 10.52 | 0.875171483    | 542   | 551  | 1      | GGGGATTAC               |
| MA0107.1 | RELA       | 8.837 | 0.831675879    | 543   | 552  | 1      | GGGATTACC               |
| MA0107.1 | RELA       | 9.531 | 0.849836687    | 1330  | 1330 | -1     | TGGAATTCT               |

Analyzed by JASPAR (<http://jaspar.genereg.net/>)

The binding site sequence of RELA on the promoter sequence of BCL2A1 was analyzed by JASPAR online database (<http://jaspar.genereg.net/>). Results revealed that 4 putative binding sites of RELA are localized in the promoter region of BCL2A1.
